# Supplementary material
Source: PubMed Central journal article supplement (PMC6519363)
Supplement: ANA-85-161-s001.pdf [file ANA-85-161-s001.pdf]

**SUPPLEMENTARY TABLE 1. Cerebrospinal Fluid Testing before Definitive Diagnosis**

| Date                | 10/2002                                                                                                                       | 11/2002                                          | 3/2007                                                                                                  | 11/2007                                                 | 2015                       | 2017                                                                                 |
|---------------------|-------------------------------------------------------------------------------------------------------------------------------|--------------------------------------------------|---------------------------------------------------------------------------------------------------------|---------------------------------------------------------|----------------------------|--------------------------------------------------------------------------------------|
| Meningitis status   | Relapse                                                                                                                       | Remission                                        | Relapse                                                                                                 | Remission                                               | Relapse                    | Relapse                                                                              |
| Medications         | None                                                                                                                          | Rifampin, pyrazinamide, ethambutol, valacyclovir | None                                                                                                    | Isoniazid, rifampin, moxifloxacin, ethambutol, steroids | Prednisone 20 mg           | Prednisone 33.75 mg                                                                  |
| Glucose, mg/dl      | 23                                                                                                                            |                                                  | 10                                                                                                      | 50                                                      | 179                        | 47                                                                                   |
| Protein, mg/dl      | 96                                                                                                                            |                                                  | 132                                                                                                     | 34                                                      | 13                         | 41                                                                                   |
| RBC, cells/ $\mu$ l | 12                                                                                                                            | 1                                                |                                                                                                         | 2                                                       | 1,075                      | 156                                                                                  |
| WBC, cells/ $\mu$ l | 60                                                                                                                            | 147                                              | 130                                                                                                     | 5                                                       | 9                          | 30                                                                                   |
| Lymphocytes, %      | 25                                                                                                                            | 83                                               | 83                                                                                                      | 0                                                       | 78                         | 92                                                                                   |
| Monocytes, %        | 60                                                                                                                            | 16                                               | 13                                                                                                      | 100                                                     | 0                          | 4                                                                                    |
| Neutrophils, %      | 15                                                                                                                            | 0                                                | 2                                                                                                       | 0                                                       | 22                         | 4                                                                                    |
| Eosinophils, %      | 0                                                                                                                             | 1                                                | 0                                                                                                       | 0                                                       | 0                          | 0                                                                                    |
| Infectious tests    | MTB PCR, AFB, bacterial, viral, and fungal cultures, HSV and VZV PCR, <i>Coccidioides</i> Ab, histoplasma Ag, crypto Ag, VDRL | VDRL, AFB culture, <i>Coccidioides</i> Ab        | MTB PCR, AFB culture, crypto Ag, bacterial and fungal culture, HSV1 and 2, CMV, VZV, EBV, and HHV6 PCRs | MTB PCR, crypto Ag, bacterial, fungal, and AFB cultures | Crypto Ag, fungal cultures | AFB culture, histoplasma Ag, Lyme Ab, VZV, HSV, HHV6, EBV, and CMV PCRs              |
| Other tests         |                                                                                                                               |                                                  | Cytology, flow cytometry                                                                                | Cytology, flow cytometry                                | IgG index elevated         | IgG index elevated, partially identical oligoclonal bands in CSF and serum, cytology |

Tests listed were negative or normal unless otherwise indicated.

Ab = antibody; AFB = acid-fast bacilli; Ag = antigen; CMV = cytomegalovirus; crypto = cryptococcal; CSF = cerebrospinal fluid; EBV = Epstein-Barr virus; HHV = human herpes virus; HSV = herpes simplex virus; MTB = *Mycobacterium tuberculosis*; PCR = polymerase chain reaction; RBC = red blood cells; VDRL = Venereal Disease Research Laboratory (test for syphilis); VZV = varicella zoster virus; WBC = white blood cells.
